# Supplementary material for: Transcriptional and metabolic programs promote the expansion of follicular helper T cells in lupus-prone mice
Source: PubMed Central journal article supplement — iScience. 2023 Apr 26;26(5):106774. doi: 10.1016/j.isci.2023.106774 (PMC10197114; doi:10.1016/j.isci.2023.106774), 2023-04-26
Supplement: mmc2.pdf [file mmc2.pdf]

**Table S1.** Representative CD4<sup>+</sup> T cells immunophenotypes of mice used in this study.

|                                      | <b>B6</b>    | <b>N</b> | <b>TC</b>    | <b>N</b> | <b>p</b> |
|--------------------------------------|--------------|----------|--------------|----------|----------|
| CD44 <sup>+</sup> % CD4 <sup>+</sup> | 49.36 ± 2.66 | 16       | 64.43 ± 2.65 | 15       | 0.0004   |
| splenocytes x 10 <sup>7</sup>        | 8.84 ± 0.43  | 4        | 18.57 ± 3.05 | 4        | 0.01     |
| Tfh % CD4 <sup>+</sup>               | 3.70 ± 0.36  | 4        | 19.80 ± 3.72 | 4        | 0.005    |
| Tfr % CD4 <sup>+</sup>               | 3.08 ± 0.16  | 4        | 7.92 ± 1.15  | 4        | 0.006    |
| Tfr / Tfh ratio                      | 0.85 ± 0.06  | 4        | 0.42 ± 0.04  | 4        | 0.001    |
| Tn % CD4 <sup>+</sup>                | 54.00 ± 1.89 | 4        | 25.00 ± 8.33 | 4        | 0.01     |
| Tem % CD4 <sup>+</sup>               | 34.58 ± 2.03 | 4        | 59.00 ± 7.21 | 4        | 0.02     |
| Tn / Tem ratio                       | 1.59 ± 1.14  | 4        | 0.51 ± 0.25  | 4        | 0.009    |
| CD69 <sup>+</sup> % CD4 <sup>+</sup> | 34.25 ± 1.35 | 4        | 68.40 ± 8.10 | 4        | 0.006    |
| Treg % CD4 <sup>+</sup>              | 7.77 ± 0.11  | 4        | 11.04 ± 1.10 | 4        | 0.02     |
| CD25 <sup>hi</sup> % Treg            | 48.93 ± 0.90 | 4        | 34.15 ± 3.36 | 4        | 0.005    |
